# Supplementary material for: IGF-1 Induces Osteogenic Differentiation of Rat Bone Marrow Mesenchymal Stem Cells by Promoting SOX4 via the MAPK/ERK Pathway
Source: PubMed Central journal article supplement — Int J Stem Cells. 2024 Apr 25;17(4):418–26. doi: 10.15283/ijsc23165 (PMC11612223; doi:10.15283/ijsc23165), 2024-04-25
Supplement: ijsc-17-4-418-supple.pdf [file ijsc-17-4-418-supple.pdf]

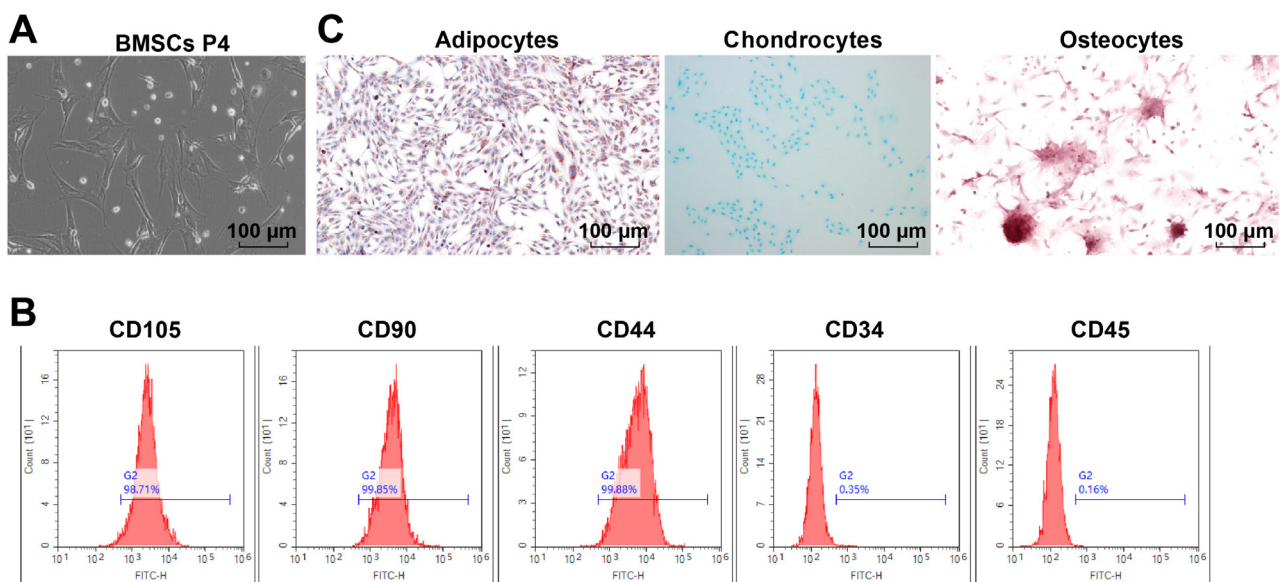

**Supplementary Fig. S1.** Identification of bone marrow mesenchymal stem cells (BMSCs). (A) BMSC morphology was observed by microscope. (B) Surface antigens (CD105, CD90, CD44, CD34, CD45) were identified by flow cytometry. (C) Adipogenic, chondrogenic, and osteogenic differentiation of BMSCs were induced.
